# Supplementary figures and images for: Quantitative Proteomic Approach Reveals Altered Metabolic Pathways in Response to the Inhibition of Lysine Deacetylases in A549 Cells under Normoxia and Hypoxia
Source: MDPI journal article supplement (doi:10.3390/ijms22073378), 2021-03-25

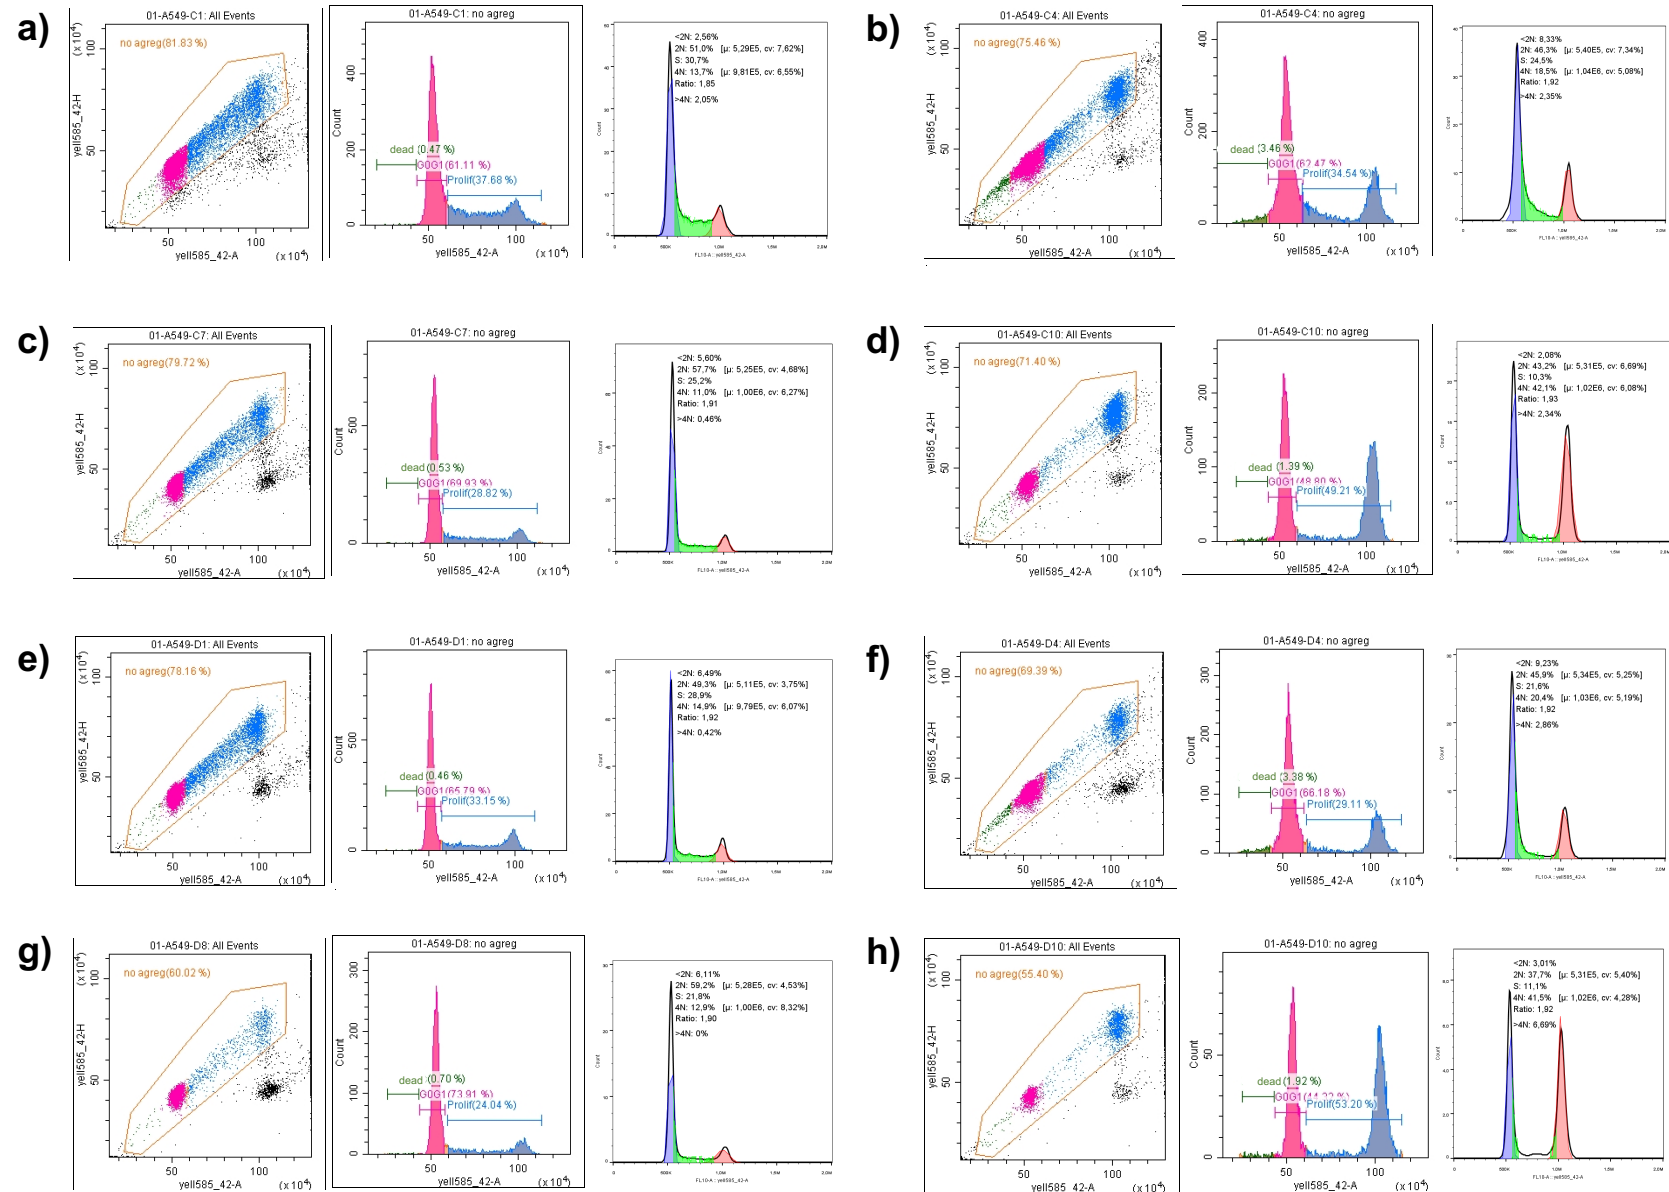

Supplement: s1 [file s1]

**A)**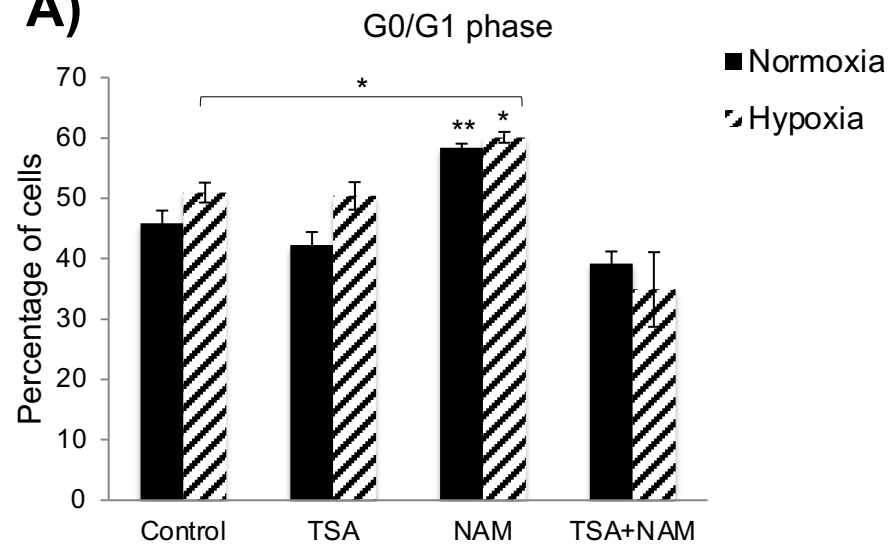**B)**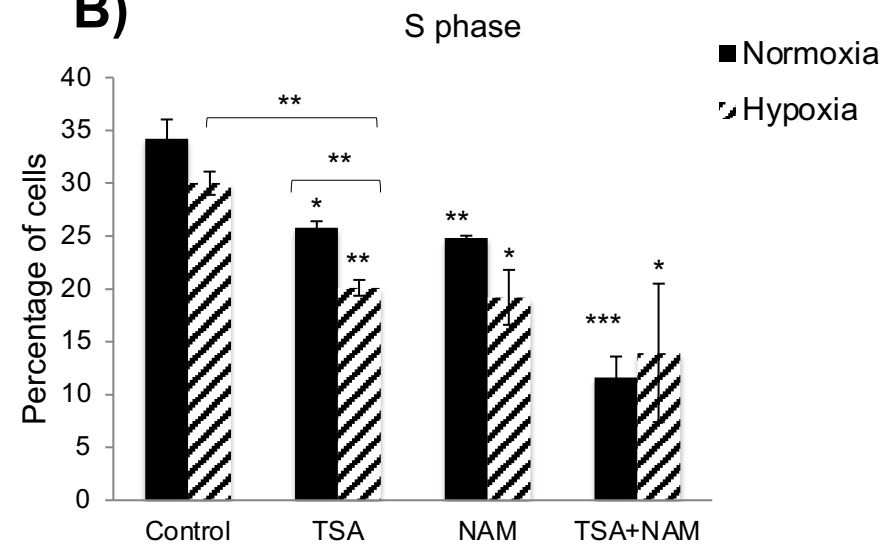**C)**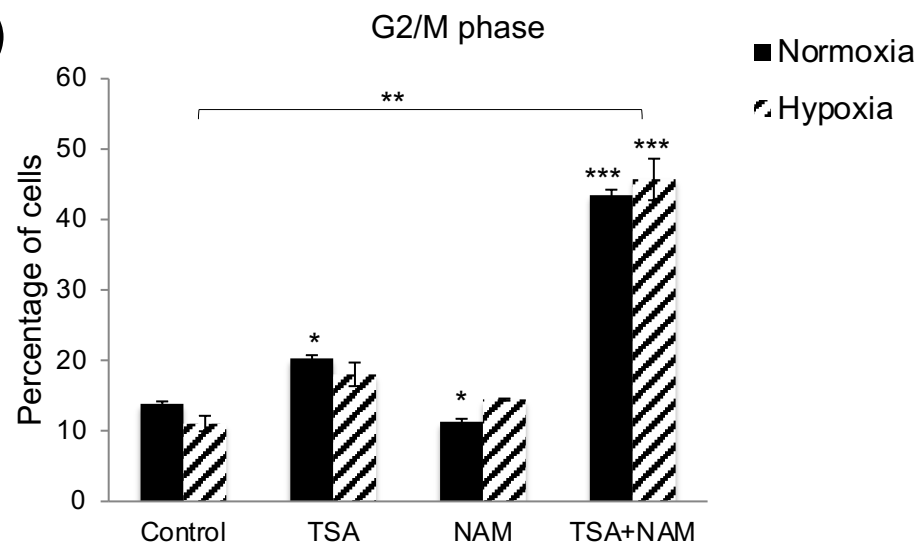

Supplement: s1 [file s1]

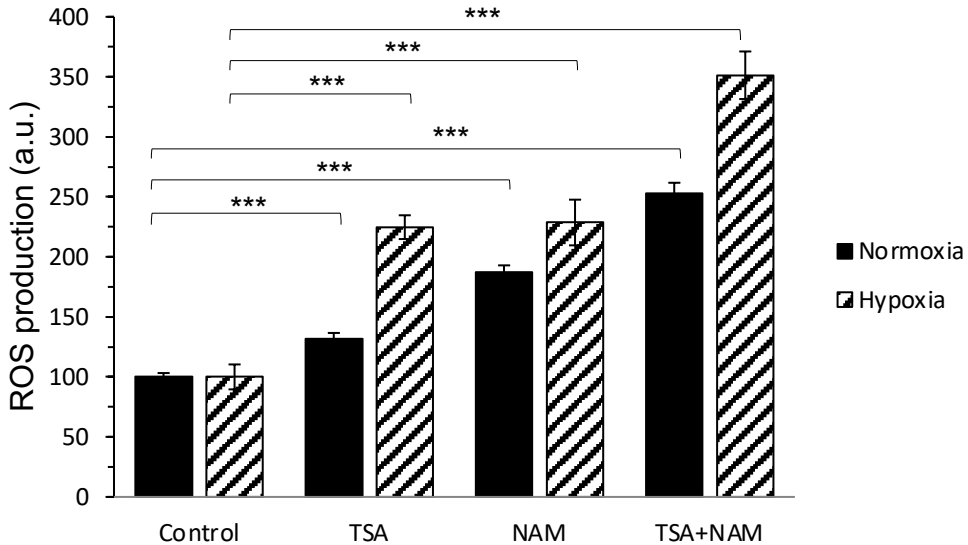

Supplement: s1 [file s1]

**A**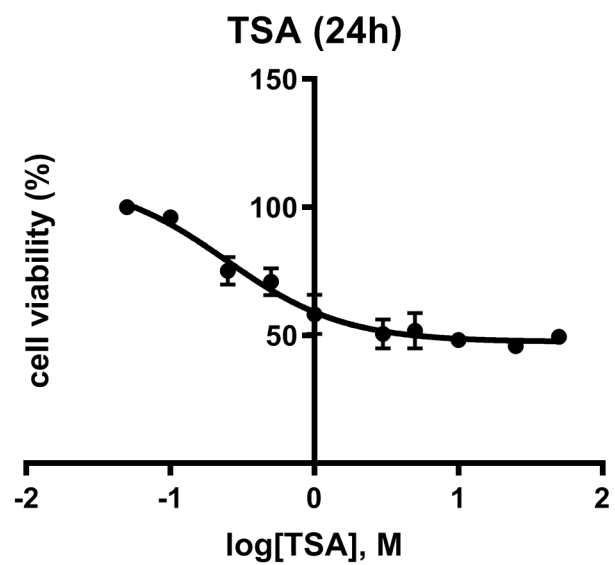**B**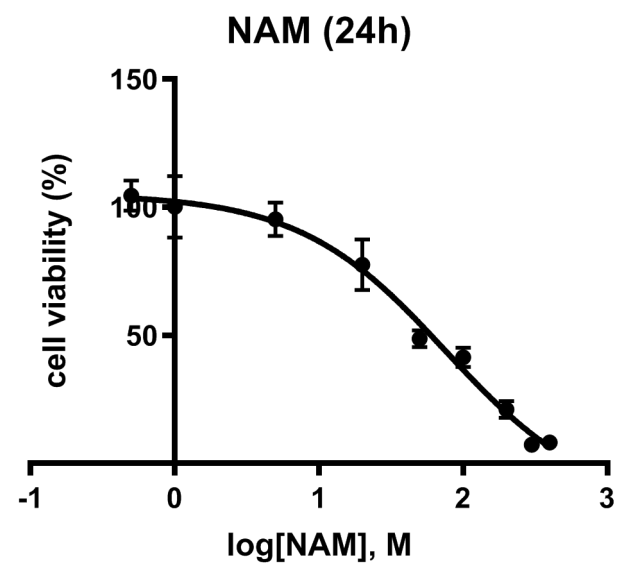

Supplement: s1 [file s1]
